# Supplementary material
Source: PubMed Central journal article supplement (PMC9926355)
Supplement: jamapediatr-e225828-s001.pdf [file jamapediatr-e225828-s001.pdf]

## Supplemental Online Content

Chandran A, Burjak M, Petimar J, et al. Changes in body mass index among school-aged youths following implementation of the Healthy, Hunger-Free Kids Act of 2010. *JAMA Pediatr*. Published online February 13, 2023.  
doi:10.1001/jamapediatrics.2022.5828

**eTable.** Change in Body Mass Index as a Percentage of the 95th Percentile Following Implementation of the Healthy, Hunger-Free Kids Act of 2010

This supplemental material has been provided by the authors to give readers additional information about their work.

**eTable.** Change in Body Mass Index as a Percentage of the 95th Percentile Following Implementation of the Healthy, Hunger-Free Kids Act of 2010

| Characteristic                           | Pre-intervention annual change in BMIz | 95% confidence interval | Post-intervention annual change in BMIz | 95% confidence interval | Annual change in BMIz post-intervention compared with pre-intervention | 95% confidence interval |
|------------------------------------------|----------------------------------------|-------------------------|-----------------------------------------|-------------------------|------------------------------------------------------------------------|-------------------------|
| Overall (n=14,121)                       | 0.145                                  | 0.052, 0.237            | -0.453                                  | -0.832, -0.075          | -0.598                                                                 | -0.984, -0.212          |
| Sub-group Models*                        |                                        |                         |                                         |                         |                                                                        |                         |
| Region (n=14,112)                        |                                        |                         |                                         |                         |                                                                        |                         |
| Northeast                                | 0.496                                  | 0.356, 0.637            | 0.114                                   | -0.276, 0.504           | -0.383                                                                 | -0.775, 0.01            |
| Midwest                                  | -0.180                                 | -0.32, -0.037           | -0.261                                  | -0.653, 0.132           | -0.081                                                                 | -0.479, 0.317           |
| South                                    | -0.518                                 | -0.92, -0.116           | -0.304                                  | -0.746, 0.139           | 0.214                                                                  | -0.241, 0.670           |
| West                                     | 0.487                                  | 0.224, 0.749            | -0.207                                  | -0.598, 0.184           | -0.694                                                                 | -1.116, -0.271          |
| Age group (n=14,121)                     |                                        |                         |                                         |                         |                                                                        |                         |
| 5-11 years                               | -0.099                                 | -0.006, 0.205           | -0.034                                  | -0.059, -0.010          | -0.807                                                                 | -1.202, -0.412          |
| 12-18 years                              | 0.292                                  | 0.106, 0.478            | -0.610                                  | -1.027, -0.192          | -0.902                                                                 | -1.323, -0.480          |
| Sex (n=14,121)                           |                                        |                         |                                         |                         |                                                                        |                         |
| Male                                     | -0.005                                 | -0.130, 0.120           | -0.533                                  | -0.916, -0.151          | -0.528                                                                 | -0.920, -0.137          |
| Female                                   | 0.318                                  | 0.007, 0.0231           | -0.351                                  | -0.731, 0.030           | -0.668                                                                 | -1.057, -0.028          |
| Median annual household income (n=9,565) |                                        |                         |                                         |                         |                                                                        |                         |
| <\$50,000                                | 0.161                                  | 0.006, 0.315            | -0.446                                  | -0.833, -0.060          | -0.607                                                                 | -1.004, -0.209          |
| ≥\$50,000                                | 0.149                                  | 0.037, 0.262            | -0.446                                  | -0.826, -0.066          | -0.596                                                                 | -0.982, -0.209          |
| Baseline BMI category (n=14,121)         |                                        |                         |                                         |                         |                                                                        |                         |
| Underweight/Normal                       | -0.128                                 | -0.18, -0.074           | -0.097                                  | -0.352, 0.158           | -0.031                                                                 | -0.230, 0.293           |
| Overweight/Obese                         | 0.424                                  | 0.268, 0.580            | 0.151                                   | -0.121, 0.423           | -0.273                                                                 | -0.552, 0.006           |

All models adjusted for self-reported race, Hispanic ethnicity, maternal education, and cohort group. \*Each sub-group model also adjusted for the corresponding covariate as a main effect in addition to including the appropriate interaction term.
