# Supplementary material
Source: PubMed Central journal article supplement (PMC9926355)
Supplement: jamapediatr-e225828-s002.pdf [file jamapediatr-e225828-s002.pdf]

## Data Sharing Statement

### Data

**Data available:** Yes

**Data types:** Deidentified participant data

**How to access data:** [echo@duke.edu](mailto:echo@duke.edu)

**When available:** With publication

### Supporting Documents

**Document types:** None

### Additional Information

**Who can access the data:** De-identified data from the ECHO Program are available through NICHD's Data and Specimen Hub (DASH). DASH is a centralized resource that allows researchers to access data from various studies via a controlled-access mechanism. Researchers can now request access to these data by creating a DASH account and submitting a Data Request Form. The NICHD DASH Data Access Committee will review the request and provide a response in approximately two to three weeks. Once granted access, researchers will be able to use the data for three years. See the DASH Tutorial for more detailed information on the process.

**Types of analyses:** Any purpose

**Mechanisms of data availability:** Following submission of a data request form.

**Any additional restrictions:** None
